# Supplementary material for: An Al3+-incorporated Ca2LuNbO6:Mn4+ oxide phosphor with dramatic deep-red and far-red emission bands
Source: Royal Society of Chemistry journal article supplement (doi:10.1039/d3tc02782a), 2023-01-01
Supplement: d3tc02782a1.pdf [file d3tc02782a1.pdf]

## Supporting information 1

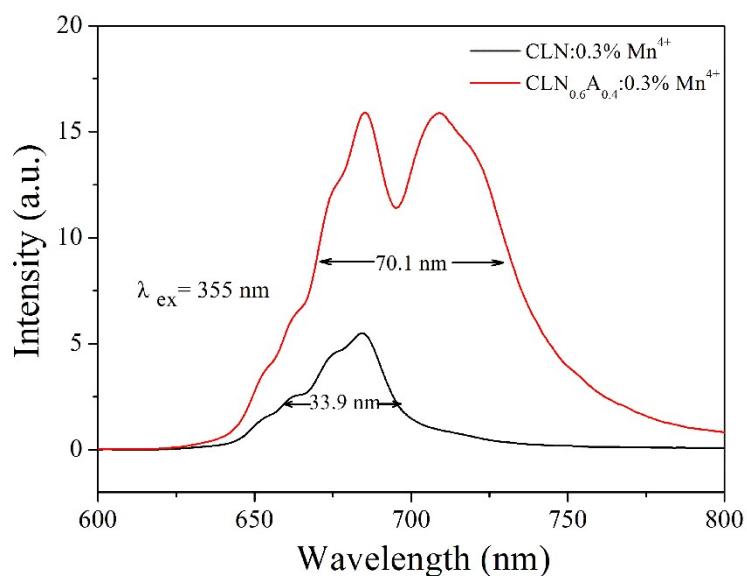

**Fig. 1.** The FWHM variation of emission spectra for the typical CLN phosphor samples.

After the incorporation of  $\text{Al}^{3+}$  in CLN, not only the deep-red and far-red emission intensities are dramatically enhanced, but also the spectral region is evidently enlarged, as can be seen from the FWHM variation (from 33.9 nm to 70.1 nm) of the emission spectra.

## Supporting information 2

Table 1 The fluorescent lifetime of  $\text{CLN}_{1-y}\text{A}_y:0.3\%\text{Mn}^{4+}$  samples

| Sample composition                                                          | Fluorescent lifetime $\tau$ (ms) |        |
|-----------------------------------------------------------------------------|----------------------------------|--------|
|                                                                             | 685 nm                           | 710 nm |
| $\text{Ca}_2\text{LuNbO}_6:0.3\%\text{Mn}^{4+}$                             | 0.36                             |        |
| $\text{Ca}_2\text{LuNb}_{0.9}\text{Al}_{0.1}\text{O}_6:0.3\%\text{Mn}^{4+}$ | 0.38                             | 0.25   |
| $\text{Ca}_2\text{LuNb}_{0.8}\text{Al}_{0.2}\text{O}_6:0.3\%\text{Mn}^{4+}$ | 0.39                             | 0.28   |
| $\text{Ca}_2\text{LuNb}_{0.7}\text{Al}_{0.3}\text{O}_6:0.3\%\text{Mn}^{4+}$ | 0.46                             | 0.30   |
| $\text{Ca}_2\text{LuNb}_{0.6}\text{Al}_{0.4}\text{O}_6:0.3\%\text{Mn}^{4+}$ | 0.54                             | 0.39   |
| $\text{Ca}_2\text{LuNb}_{0.5}\text{Al}_{0.5}\text{O}_6:0.3\%\text{Mn}^{4+}$ | 0.69                             | 0.46   |

As can be seen from Table 1, the fluorescent lifetimes ( $\tau$ ) of  $\text{CLN}_{1-y}\text{A}_y:0.3\%\text{Mn}^{4+}$  samples are gradually increased with the increase of  $\text{Al}^{3+}$  concentration ( $y$ ), no matter it is monitored with 685 nm or 710 nm emission band. However, the fluorescent time monitored with 710 nm is always smaller than that monitored with 685 nm for the same sample.
